# Supplementary material for: The Obesity Amelioration Effect in High-Fat-Diet Fed Mice of a Homogeneous Polysaccharide from Codonopsis pilosula
Source: MDPI journal article supplement (doi:10.3390/molecules27165348), 2022-08-22
Supplement: s1 [file s1]

Supplementary Materials

# The Obesity Amelioration Effect in High-Fat-Diet Fed Mice of a Homogeneous Polysaccharide from *Codonopsis pilosula*

Qi Su <sup>1,2,3,†</sup>, Jiangyan Huo <sup>2,3,†</sup>, Yibin Wang <sup>2,3,†</sup>, Yang Zhou <sup>2,3</sup>, Dan Luo <sup>2,3</sup>, Jinjun Hou <sup>2,3</sup>, Zijia Zhang <sup>2,3</sup>, Huali Long <sup>2,3</sup>, Xianchun Zhong <sup>2,3</sup>, Cen Xie <sup>2,3</sup>, Min Lei <sup>2,3,\*</sup>, Yameng Liu <sup>2,3,\*</sup> and Wanying Wu <sup>1,2,3,\*</sup>

<sup>1</sup> School of Chinese Materia Medica, Nanjing University of Chinese Medicine, Nanjing 210023, China

<sup>2</sup> Shanghai Research Center for Modernization of Traditional Chinese Medicine, Shanghai Institute of Materia Medica, Chinese Academy of Sciences, Shanghai 201203, China

<sup>3</sup> National Engineering Laboratory for TCM Standardization Technology, Shanghai Institute of Materia Medica, Chinese Academy of Sciences, Beijing 100049, China

\* Correspondence: mlei@simm.ac.cn (M.L.); yameng\_liu@simm.ac.cn (Y.L.); wanyingwu@simm.ac.cn (W.W.)

† These authors contributed equally to this work.

**Citation:** Su, Q.; Huo, J.; Wang, Y.; Zhou, Y.; Luo, D.; Hou, J.; Zhang, Z.; Long, H.; Zhong, X.; Xie, C.; et al. The Obesity Amelioration Effect in High-Fat-Diet Fed Mice of a Homogeneous Polysaccharide from *Codonopsis pilosula*. *Molecules* **2022**, *27*, 5348. <https://doi.org/10.3390/molecules27165348>

Academic Editor: Fabio Sonvico

Received: 29 June 2022

Accepted: 10 August 2022

Published: 22 August 2022

**Publisher's Note:** MDPI stays neutral with regard to jurisdictional claims in published maps and institutional affiliations.

**Abstract:** A homogeneous polysaccharide coded as CPP-1 was extracted and purified from the root of *Codonopsis pilosula* (Franch.) Nannf. by water extraction, ethanol precipitation, and column chromatography. Its structure was analyzed by HPGPC-ELSD, HPLC, GC-MS, FT-IR, and NMR techniques. The results indicated that CPP-1 was composed of mannose (Man), glucose (Glc), galactose (Gal), and arabinose (Ara) at a molar ratio of 5.86:51.69:34.34:8.08. The methylation analysis revealed that the main glycosidic linkage types of CPP-1 were (1→4)-linked-Gal residue, (1→3)-linked-Glc residue, (1→3,4)-linked-Glc residue, (1→2,3,4)-linked-Glc residue, (1→)-linked-Glc residue, (1→)-linked-Man residue, and (1→)-linked-Ara residue. In vivo efficacy trial illustrated that CPP-1 supplements could alleviate HFD-induced mice obesity significantly, as well as improve obesity-induced disorders of glucose metabolism, alleviate insulin resistance, and improve the effects of lipid metabolism. The findings indicate that this polysaccharide has the potential for the treatment of obesity.

**Keywords:** *Codonopsis pilosula*; polysaccharide; structural characterization; obesity

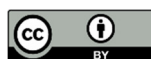

**Copyright:** © 2022 by the authors. Licensee MDPI, Basel, Switzerland. This article is an open access article distributed under the terms and conditions of the Creative Commons Attribution (CC BY) license (<https://creativecommons.org/licenses/by/4.0/>).

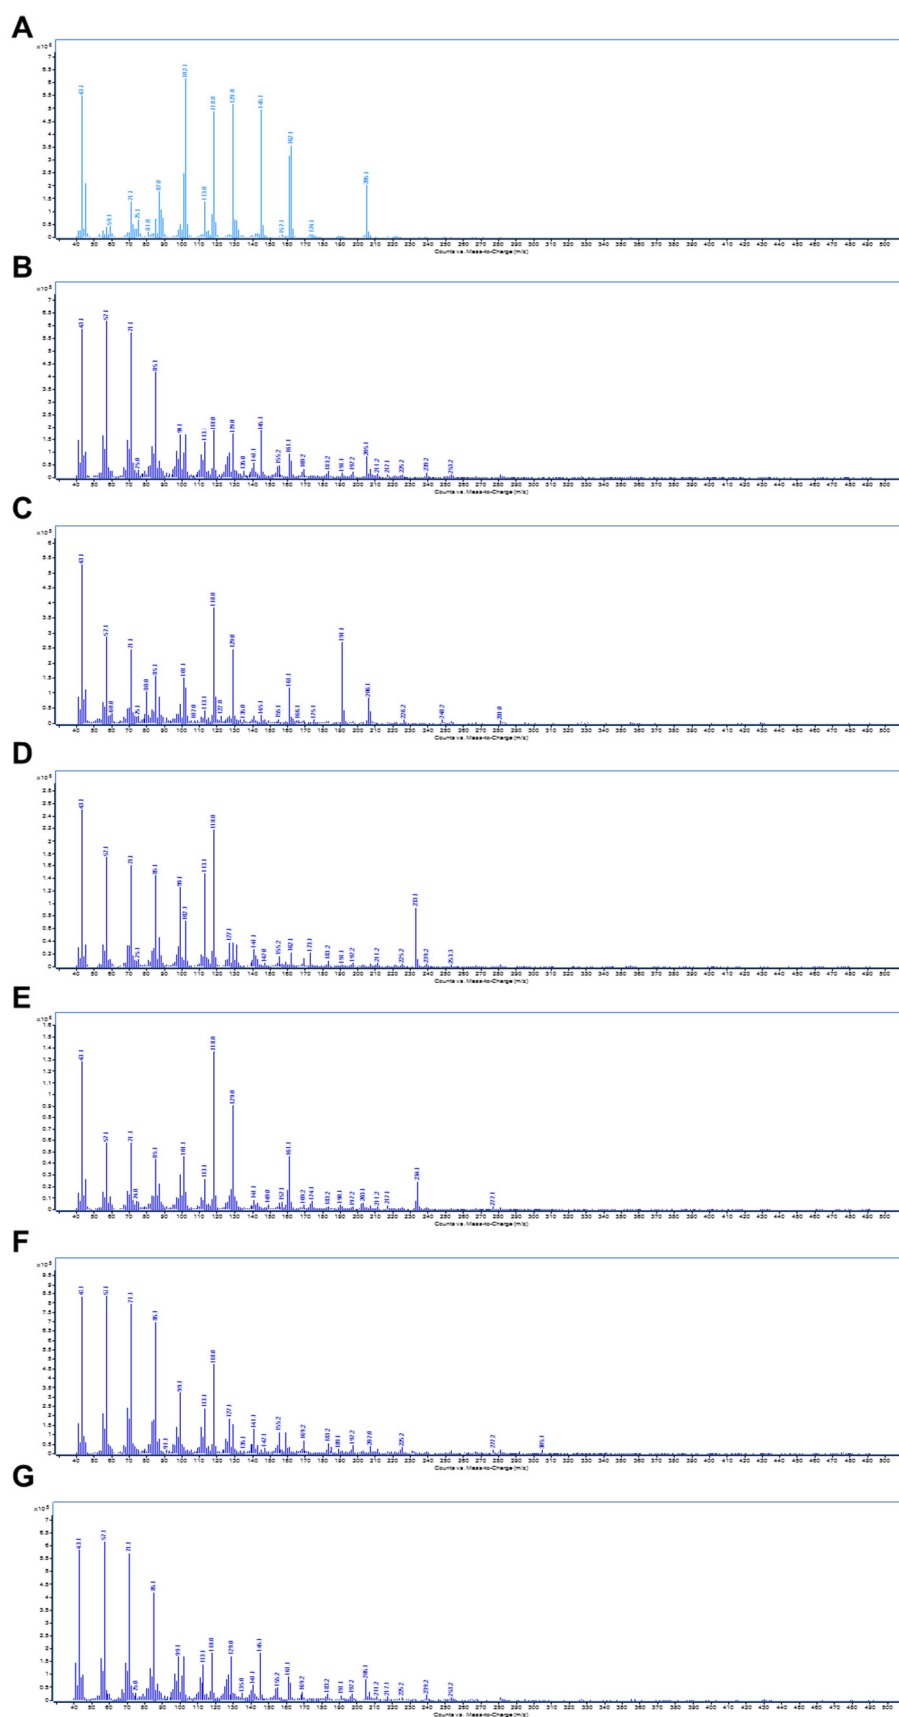

**Figure S1.** The ion fragments of different linkage patterns in GC/MS. (A) t-Glc(p), (B) t-Man(p), (C) t-Ara(p), (D) 1,4-Gal(p), (E) 1,3-Glc(p), (F) 1,3,4-Glc(p), (G) 1,2,3,4-Glc(p).
